# Supplementary material for: NiOOH-mediated electron injection into Ti 3 C 2 F x to weaken Ti–H bonds for accelerated photocatalytic hydrogen production
Source: Royal Society of Chemistry journal article supplement (doi:10.1039/d5tc03772g), 2025-12-23
Supplement: d5tc03772g1.pdf [file d5tc03772g1.pdf]

## Supporting Information

### **NiOOH-Mediated Electron Injection into $\text{Ti}_3\text{C}_2\text{F}_x$ to Weaken Ti-H**

#### **Bond for Accelerated Photocatalytic Hydrogen Production**

Jianming Duanmu<sup>a</sup>, Ping Wang<sup>a,b,\*</sup>, Xuefei Wang<sup>b</sup>, Feng Chen<sup>b</sup>

<sup>a</sup>School of Materials Science and Engineering, Wuhan University of Technology,  
Wuhan 430070, People's Republic of China

<sup>b</sup>School of Chemistry, Chemical Engineering and Life Sciences, Wuhan University of  
Technology, Wuhan 430070, People's Republic of China

\*Corresponding authors. Tel: +86(27)87749379;

E-mail: wangping0904@whut.edu.cn (Ping Wang)

**Number of pages: 17**

**Number of Figures: 8**

## SI-1 Materials

Ti<sub>3</sub>AlC<sub>2</sub> powders (> 98 wt% purity) were purchased from beike 2D materials Co., Ltd, ammonium fluoride (NH<sub>4</sub>F), hydrochloric acid (HCl, 38%), dimethyl sulfoxide (DMSO), Nickel(II) chloride hexahydrate (NiCl<sub>2</sub>·6H<sub>2</sub>O), Urea, Cadmium acetate dihydrate(CH<sub>3</sub>COOCd·2H<sub>2</sub>O), Sodium Sulfide Decahydrate(Na<sub>2</sub>S·9H<sub>2</sub>O), Sodium sulfite(Na<sub>2</sub>SO<sub>3</sub>), sodium sulphide (Na<sub>2</sub>SO<sub>4</sub>) and ethyl-alcohol (C<sub>2</sub>H<sub>5</sub>OH) were of analytical grade from Shanghai Chemical Reagent Ltd. and used without further purification.

## SI-2 Characterization

Microstructures and morphologies of the as-prepared samples were conducted by X-ray diffraction (XRD) ((D/MAXRB, RIGAKU, Japan), Field emission scanning electron microscope (FESEM, JSM 7500F, Japan) and transmission electron microscopy (HRTEM, JEM 2100F, Japan). Elemental analyses of photocatalysts were measured via X-ray photoelectron spectroscopy (XPS) ((ESCALAB 250Xi, Thermo Fisher Scientific, USA). All binding energies in the XPS spectra were calibrated using the peak position of C 1s (284.8 eV). Optical properties were evaluated by UV-Vis spectrophotometry (UV-2450, Shimadzu, Japan) using BaSO<sub>4</sub> as reference standard, systematically recording light absorption characteristics across 200-800 nm wavelength range. Photoluminescence dynamics were investigated using an FLS920 fluorescence spectrophotometer (Edinburgh Instruments, UK) equipped with time-correlated single photon counting (TCSPC) system, enabling precise acquisition of

time-resolved photoluminescence (TRPL) spectral data.

### **SI-3 Photoelectrochemical measurements**

Photoelectrochemical (PEC) curves were measured on an electrochemical analyzer (CHI660E, China) in a standard three-electrode configuration according to our previous works<sup>[1,2]</sup>. The prepared samples were loaded on fluorine-doped tin oxide (FTO) conductor glass, a standard Ag/AgCl electrode and the platinum foil as the working electrodes, reference electrode and counter electrode, respectively, with Na<sub>2</sub>SO<sub>4</sub> (0.5 mol L<sup>-1</sup>) as the electrolyte solution. The method of working electrodes was the same as in our previous works. Linear sweep voltammetry (LSV) curves were obtained in the potential ranging of -1.0 to -1.6 V with a scan rate of 10 mV s<sup>-1</sup>. Transient photocurrent responses with time (*i-t* curves) were recorded at 0.5 V bias potential during periodic ON/OFF illumination cycles under a 3W LED lamp (365 nm). Electrochemical impedance spectroscopy (EIS) curves were conducted at the frequency range of 0.01-10<sup>5</sup> Hz with an ac amplitude of 10 mV under the open-circuit voltage.

### **SI-4 Photocatalytic H<sub>2</sub>-evolution measurement**

The photocatalytic hydrogen evolution performance was evaluated in a standard three-neck quartz photoreactor (250 mL capacity). The reaction system contained 80 mL of an aqueous mixed solution of sodium sulfide and sodium sulfite (specifically, 2.52 g Na<sub>2</sub>SO<sub>3</sub> and 6.72 g Na<sub>2</sub>S·6H<sub>2</sub>O dissolved in deionized water) as the sacrificial agent medium. Prior to experiments, the reaction system was purged with high-purity

nitrogen for 30 minutes to establish an inert atmosphere and remove dissolved oxygen. The photoexcitation system consisted of four high-power LED units (central wavelength  $365\pm5$  nm, 3 W per lamp) arranged in a circular array, achieving uniform irradiation through optical fibers (light power density approximately  $80 \text{ mW cm}^{-2}$ ). Hydrogen evolution kinetics were monitored via manual sampling. After reaching steady-state hydrogen production rate, 400  $\mu\text{L}$  gas samples were collected hourly using a gas-tight syringe and quantitatively analyzed by a Shimadzu GC-2014C gas chromatograph equipped with a TCD detector and 5 Å molecular sieve column (high-purity argon carrier gas, column temperature  $80^\circ\text{C}$ ). For cycling stability tests, sampling was performed every 30 minutes. Each cycle was conducted for 120 minutes, followed by opening the gas inlet/outlet valves to inject high-purity nitrogen for 15 minutes before sealing the system for subsequent hydrogen production cycles. The apparent quantum efficiency (AQE) was calculated according to **Equation S1**:

$$\begin{aligned}
 \text{AQE}(\%) &= \frac{\text{number of reacted electrons}}{\text{number of incident photons}} \times 100\% \\
 &= \frac{\text{number of evolved H}_2 \text{ molecules} \times 2}{\text{number of incident photons}} \times 100\% \\
 &= \frac{2R_{\text{H}_2} t_1 N_A}{\frac{E A t_2 \lambda}{hc}} \\
 &= 6.6482 \times 10^{-5} \times \frac{R_{\text{H}_2}}{E A \lambda} \#(S1)
 \end{aligned}$$

$R_{\text{H}_2}$  ( $\mu\text{mol h}^{-1}$ ) represents the  $\text{H}_2$ -evolution rate,  $E$  ( $\text{W cm}^{-2}$ ) represents the monochromatic light intensity,  $A$  ( $\text{cm}^2$ ) represents the light radiation area of the reaction system,  $\lambda$  (m) represents the monochromatic wavelength, while  $t_1$  (h),  $t_2$  (s),  $h$

(W), and  $c$  ( $\text{m s}^{-1}$ ) are constants with values of 1, 3600,  $6.626 \times 10^{-34}$  and  $3 \times 10^8$ , respectively. In this work, 50 mg of the photocatalyst was irradiated by four 365 nm LED lights as the light source. The light radiation area ( $A$ ) and the light intensity ( $E$ ) of the reaction system are  $1 \times 4 \text{ cm}^2$  and  $80 \text{ mW cm}^{-2}$ , respectively.

## SI-5 DFT calculations

The calculations were carried out by using the Vienna *ab initio* simulation package (VASP)<sup>[3,4]</sup>. The generalized gradient approximation (GGA) with Perdew-Burke-Ernzerhof (PBE) functional<sup>[5,6]</sup> was selected to reveal the exchange-correlation interaction. The cutoff energy and Monkhorst-Pack k-point mesh was set as 450 eV and  $3 \times 3 \times 1$ , respectively. The convergence threshold for total energy converged within  $10^{-5}$  eV/atom and  $0.01 \text{ eV} \cdot \text{\AA}^{-1}$  for force. To eliminate interactions between periodic structures, a vacuum of 15 Å was added. The Gibbs free energy of H atom adsorption ( $\Delta G_{\text{H}^*}$ ) was defined as following the equation S2:

$$\Delta G_{\text{H}^*} = \Delta E_{\text{H}^*} + \Delta E_{\text{ZPE}} - T\Delta S_{\text{H}} \quad (\text{S2})$$

Where  $\Delta E_{\text{H}^*}$ ,  $\Delta E_{\text{ZPE}}$ ,  $T\Delta S_{\text{H}}$  are the differential hydrogen  $\Delta E_{\text{H}^*}$  adsorption energy, the change in zero-point energy and entropy between the adsorbed hydrogen and molecular hydrogen in gas phase, respectively, and  $T$  is the temperature. The term  $T\Delta S_{\text{H}}$  was calculated to be -0.20 eV. Additionally,  $\Delta E_{\text{H}^*}$  represents the change in H adsorption energy, which can be defined by the following **Equation S3**:

$$\Delta E_{\text{H}^*} = \Delta E_{(\text{Surface} + \text{H}^*)} - \Delta E_{(\text{Surface})} - \frac{1}{2}\Delta E_{\text{H}_2} \quad (\text{S3})$$

Where  $\Delta E_{(\text{Surface})}$  and  $\Delta E_{(\text{Surface}+\text{H}^*)}$  respectively represent the surface energy of the material and the surface energy of the material with an adsorbed hydrogen atom, while  $\Delta E_{\text{H}}$  represents the energy of a hydrogen molecule in the gas phase.

In this work,  $\text{Ti}_3\text{C}_2$  model was constructed by removing Al atom in the  $\text{Ti}_3\text{AlC}_2$  (002) model. The  $(3 \times 3 \times 1)$  supercell containing 27 Ti and 18 C atoms of crystalline.  $\text{Ti}_3\text{C}_2\text{F}_x$  structure was added 18 F atoms on the basis of  $\text{Ti}_3\text{C}_2$  model and performed for the following theoretical calculations.  $\text{Ti}_3\text{C}_2\text{F}_x$  (002) model was composed of 27 Ti atoms, 18 C atoms and 18 F atoms. The NiOOH model was constructed by cleaving along the (002) plane and expanding the primitive cell into a  $3 \times 3 \times 1$  supercell, comprising 9 Ni atoms, 18 O atoms, and 9 H atoms (36 atoms in total). The work function is defined as  $\Phi = E_v - E_f$ , where  $E_v$  and  $E_f$  are the electrostatic potentials of the vacuum and Fermi levels, respectively.

## References

- [1] R. Liu, P. Wang, X. Wang, F. Chen, H. Yu, Facilitating Oriented Electron Transfer from Cu to  $\text{Mo}_2\text{C}$  MXene for Weakened Mo—H Bond Toward Enhanced Photocatalytic  $\text{H}_2$  Generation, *Small* 21 (2024). DOI: <https://doi.org/10.1002/sml.202408330>.
- [2] Y. Cao, P. Wang, X. Wang, F. Chen, H. Yu, Charge self-regulation of Ti sites in  $\text{Ti}_3\text{C}_2$  MXene via rich unsaturated Ti for boosted photocatalytic hydrogen generation, *Journal of Materials Chemistry C* 12 (2024) 10152-10160. DOI: <https://doi.org/10.1039/d4tc01076k>.
- [3] G. Kresse, J. Hafner, *Phys. Rev. B* 47 (1993) 558. DOI: <https://doi.org/10.1103/PhysRevB.47.558>.
- [4] P.E. Blöchl, *Phys. Rev. B* 50 (1994) 17953. DOI: <https://doi.org/10.1103/PhysRevB.50.17953>.
- [5] J.P. Perdew, K. Burke, M. Ernzerhof, *Phys. Rev. Lett.* 77 (1996) 3865. DOI: <https://doi.org/10.1103/PhysRevLett.77.3865>.
- [6] G. Kresse, D. Joubert, *Phys. Rev. B* 59 (1999) 1758. DOI: <https://doi.org/10.1103/PhysRevB.59.1758>.

## Figure captions

**Fig. S1.** Photocatalytic H<sub>2</sub>-evolution rate of (a) CdS, (b) NiOOH-Ti<sub>3</sub>C<sub>2</sub>F<sub>x</sub>(1:5)/CdS-1%, (c) NiOOH-Ti<sub>3</sub>C<sub>2</sub>F<sub>x</sub>(1:5)/CdS-5%, and (d) NiOOH-Ti<sub>3</sub>C<sub>2</sub>F<sub>x</sub>(1:5)/CdS-10%.

**Fig. S2.** Photocatalytic H<sub>2</sub>-evolution rate of (a) Ti<sub>3</sub>C<sub>2</sub>F<sub>x</sub>, (b) NiOOH-Ti<sub>3</sub>C<sub>2</sub>F<sub>x</sub>, (c) CdS, (d) Ti<sub>3</sub>C<sub>2</sub>F<sub>x</sub>/CdS, and (e) NiOOH-Ti<sub>3</sub>C<sub>2</sub>F<sub>x</sub>/CdS.

**Fig. S3.** Photocatalytic H<sub>2</sub>-evolution rate of (a) TiO<sub>2</sub>, (b) Ti<sub>3</sub>C<sub>2</sub>F<sub>x</sub>/TiO<sub>2</sub>, (c) NiOOH-Ti<sub>3</sub>C<sub>2</sub>F<sub>x</sub>(1:10)/TiO<sub>2</sub>, (d) NiOOH-Ti<sub>3</sub>C<sub>2</sub>F<sub>x</sub>(1:5)/TiO<sub>2</sub>, and (e) NiOOH-Ti<sub>3</sub>C<sub>2</sub>F<sub>x</sub>(1:2)/TiO<sub>2</sub>.

**Fig. S4.** (A) XPS survey spectra and (B) high-resolution spectra of F 1s for (a) Ti<sub>3</sub>C<sub>2</sub>F<sub>x</sub> and (b) NiOOH-Ti<sub>3</sub>C<sub>2</sub>F<sub>x</sub>(1:1).

**Fig. S5.** Front and top views of the optimized models of (A) Ti<sub>3</sub>C<sub>2</sub> MXene, (B) Ti<sub>3</sub>C<sub>2</sub>F<sub>x</sub>, (C) NiOOH-Ti<sub>3</sub>C<sub>2</sub>F<sub>x</sub>.

**Fig. S6.** The optimized models for DFT calculations of (A) NiOOH; (B) H-NiOOH.

**Fig. S7.** (A). Top view of the different hydrogen adsorption sites on NiOOH-Ti<sub>3</sub>C<sub>2</sub>F<sub>x</sub>; Demonstration of different adsorption sites on NiOOH-Ti<sub>3</sub>C<sub>2</sub>F<sub>x</sub>, exemplified by (B). top site of Ti; (C). top site of Ni; (D). top site of C; (E). top site of O.

**Fig. S8.** (A) Electrochemical impedance spectra (EIS) and (B) linear sweep voltammetry (LSV) curves of (a) CdS, (b) Ti<sub>3</sub>C<sub>2</sub>F<sub>x</sub>/CdS, (c) NiOOH-Ti<sub>3</sub>C<sub>2</sub>F<sub>x</sub>(1:1)/CdS, and (d) NiOOH-Ti<sub>3</sub>C<sub>2</sub>F<sub>x</sub>(1:5)/CdS.

**Table S1.** The energy dispersive X - ray Spectroscopy (EDS) spectrum obtained by TEM for NiOOH-Ti<sub>3</sub>C<sub>2</sub>F<sub>x</sub>(1:1)/CdS.

| Element | Counts Mass (%) | Sigma Atom (%) | Compound Mass (%) |
|---------|-----------------|----------------|-------------------|
| Cd      | 65.15           | 0.33           | 26.16             |
| S       | 17.27           | 0.12           | 24.30             |
| Ti      | 1.27            | 0.04           | 1.19              |
| C       | 9.29            | 0.08           | 34.90             |
| Ni      | 3.11            | 0.07           | 2.40              |
| O       | 3.29            | 0.06           | 11.05             |

**Table S2.** Fluorescence emission lifetime and relevant percentage data fitted by a three-exponential function.

| Samples                                                   | $\tau_1$ (ns) | $A_1$   | $\tau_2$ (ns) | $A_2$  | $\tau_3$ (ns) | $A_3$  | Average<br>lifetime( $\tau_a$ ) (ns) |
|-----------------------------------------------------------|---------------|---------|---------------|--------|---------------|--------|--------------------------------------|
| CdS                                                       | 0.61          | 8787.08 | 3.12          | 2654.1 | 12.05         | 310.47 | 4.268010242                          |
| Ti <sub>3</sub> C <sub>2</sub> F <sub>x</sub> /CdS        | 0.8           | 9076.31 | 3.26          | 2809.5 | 10.64         | 372.86 | 3.819960573                          |
| NiOOH-Ti <sub>3</sub> C <sub>2</sub> F <sub>x</sub> (1:1) | 0.67          | 9882.08 | 3.17          | 2514.6 | 11.2          | 297.66 | 3.740000403                          |
| NiOOH-Ti <sub>3</sub> C <sub>2</sub> F <sub>x</sub> (1:5) | 0.58          | 9313.96 | 2.86          | 2441.5 | 11.13         | 262.38 | 3.633198231                          |

The above-fitted parameters are acquired via the following tri-exponential formulas:

$$I_t = I_0 + A_1 \exp(-t/\tau_1) + A_2 \exp(-t/\tau_2) + A_3 \exp(-t/\tau_3) \quad (5)$$

$$\tau_a = (A_1 \tau_1^2 + A_2 \tau_2^2 + A_3 \tau_3^2) / (A_1 \tau_1 + A_2 \tau_2 + A_3 \tau_3) \quad (6)$$

where  $I_0$  is the baseline correction value,  $A_1$ ,  $A_2$ , and  $A_3$  represent the tri-exponential factors, and  $\tau_1$ ,  $\tau_2$ ,  $\tau_3$ , and  $\tau_a$  correspond to the lifetime in various stages (radiation, non-radiation, and energy transfer) and average lifetime.

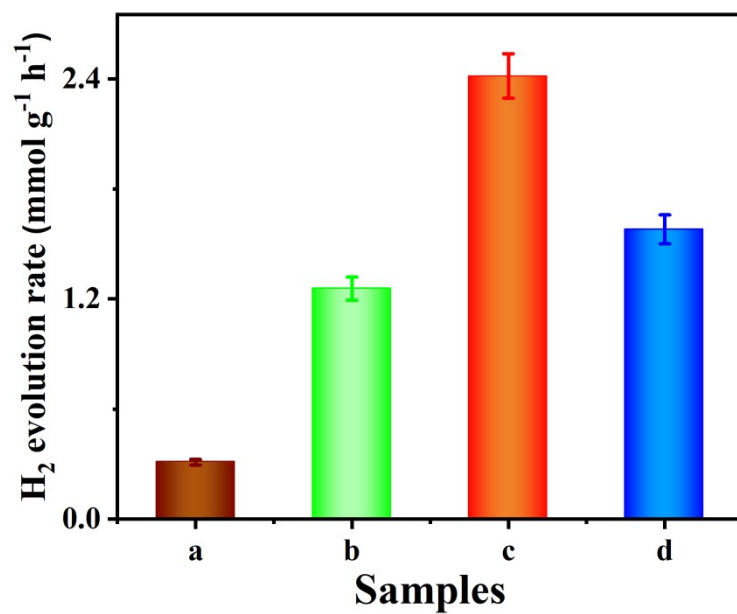

**Fig. S1.** Photocatalytic H<sub>2</sub>-evolution rate of (a) CdS, (b) NiOOH-Ti<sub>3</sub>C<sub>2</sub>F<sub>x</sub>(1:5)/CdS-1%, (c) NiOOH-Ti<sub>3</sub>C<sub>2</sub>F<sub>x</sub>(1:5)/CdS-5%, and (d) NiOOH-Ti<sub>3</sub>C<sub>2</sub>F<sub>x</sub>(1:5)/CdS-10%.

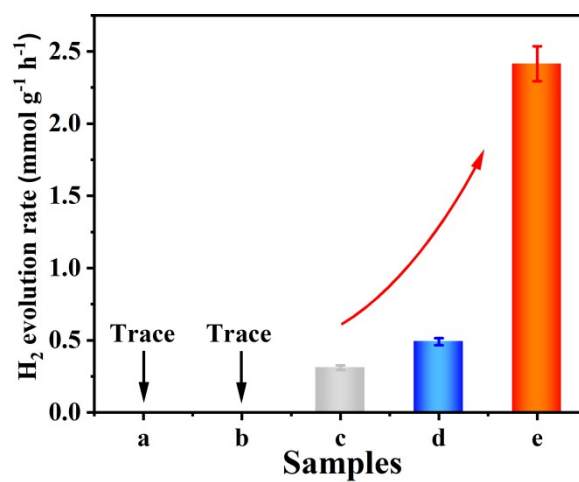

**Fig. S2.** Photocatalytic H<sub>2</sub>-evolution rate of (a) Ti<sub>3</sub>C<sub>2</sub>F<sub>x</sub>, (b) NiOOH-Ti<sub>3</sub>C<sub>2</sub>F<sub>x</sub>, (c) CdS, (d) Ti<sub>3</sub>C<sub>2</sub>F<sub>x</sub>/CdS, and (e) NiOOH-Ti<sub>3</sub>C<sub>2</sub>F<sub>x</sub>/CdS.

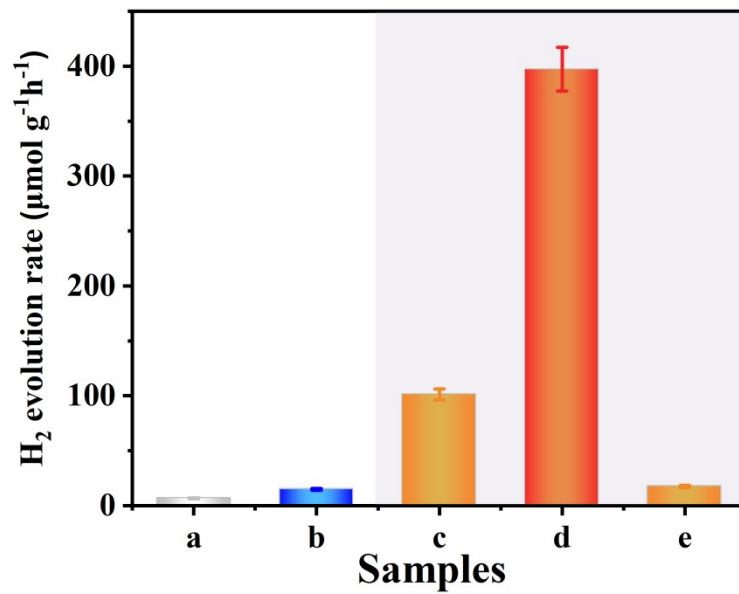

**Fig. S3.** Photocatalytic H<sub>2</sub>-evolution rate of (a) TiO<sub>2</sub>, (b) Ti<sub>3</sub>C<sub>2</sub>F<sub>x</sub>/TiO<sub>2</sub>, (c) NiOOH-Ti<sub>3</sub>C<sub>2</sub>F<sub>x</sub>(1:2)/TiO<sub>2</sub>, (d) NiOOH-Ti<sub>3</sub>C<sub>2</sub>F<sub>x</sub>(1:5)/TiO<sub>2</sub>, and (e) NiOOH-Ti<sub>3</sub>C<sub>2</sub>F<sub>x</sub>(1:10)/TiO<sub>2</sub>.

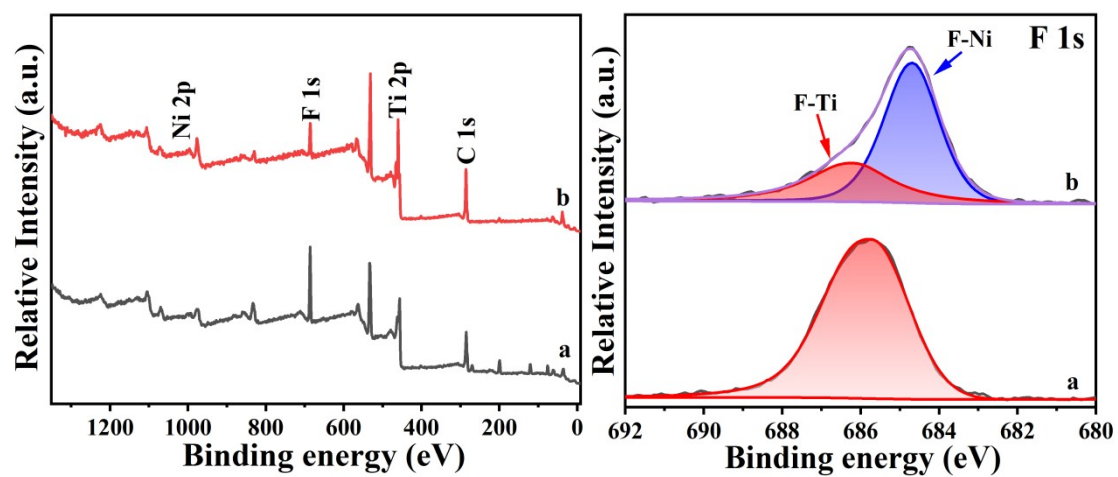

**Fig. S4.** (A) XPS survey spectra and (B) high-resolution spectra of F 1s for (a)  $\text{Ti}_3\text{C}_2\text{F}_x$  and (b)  $\text{NiOOH-Ti}_3\text{C}_2\text{F}_x(1:1)$ .

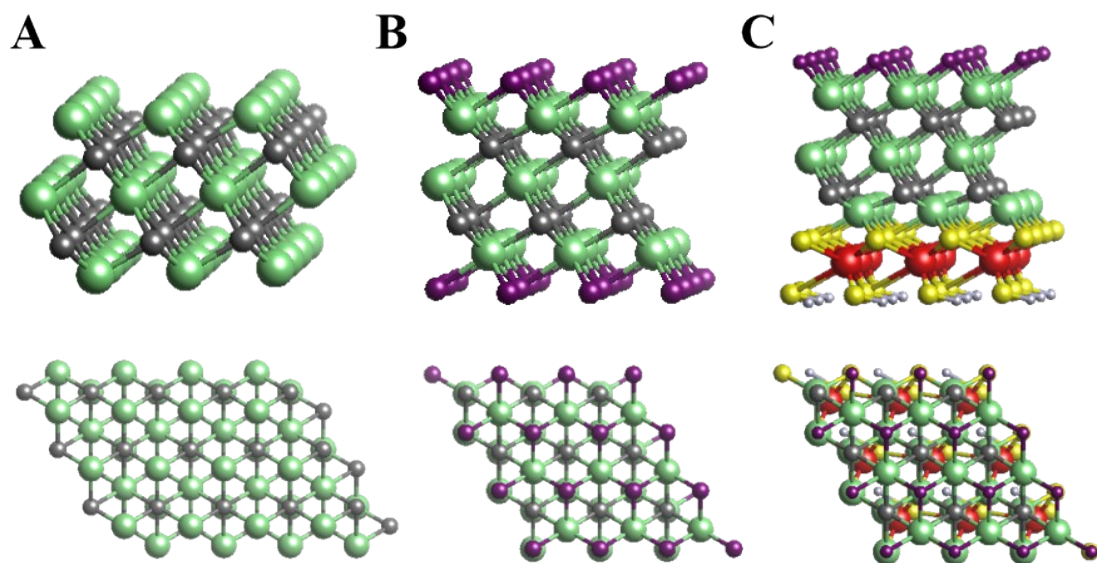

**Fig. S5.** Front and top views of the optimized models of (A)  $\text{Ti}_3\text{C}_2$  MXene, (B)  $\text{Ti}_3\text{C}_2\text{F}_x$ , (C)  $\text{NiOOH-Ti}_3\text{C}_2\text{F}_x$ .

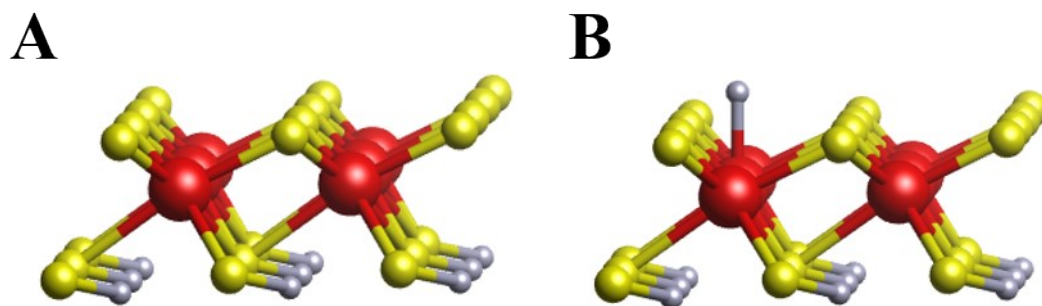

**Fig. S6.** The optimized models for DFT calculations of (A) NiOOH; (B) H-NiOOH.

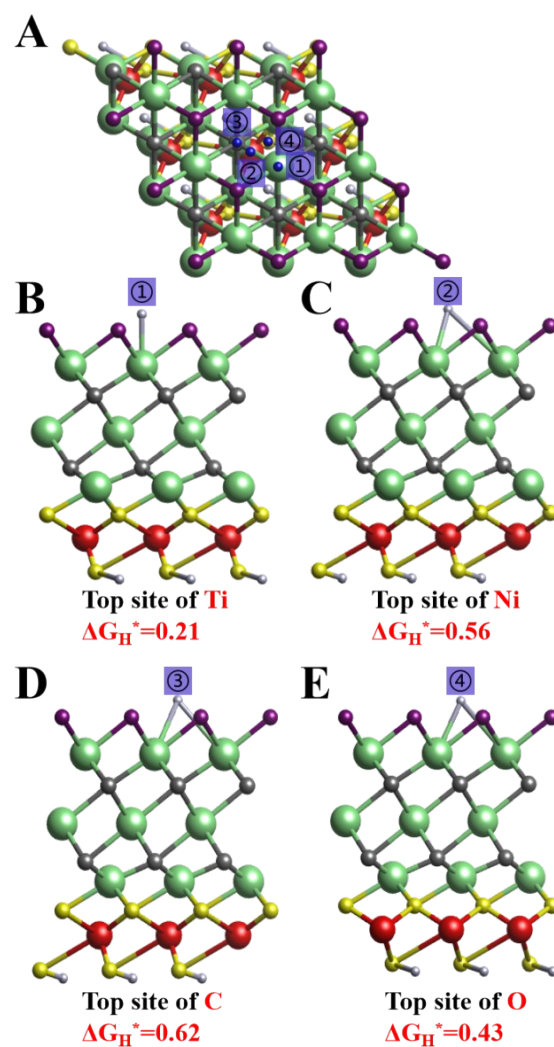

**Fig. S7.** (A). Top view of the different hydrogen adsorption sites on NiOOH-Ti<sub>3</sub>C<sub>2</sub>F<sub>6</sub>; Demonstration of different adsorption sites on NiOOH-Ti<sub>3</sub>C<sub>2</sub>F<sub>6</sub>, exemplified by (B). top site of Ti; (C). top site of Ni; (D). top site of C; (E). top site of O.

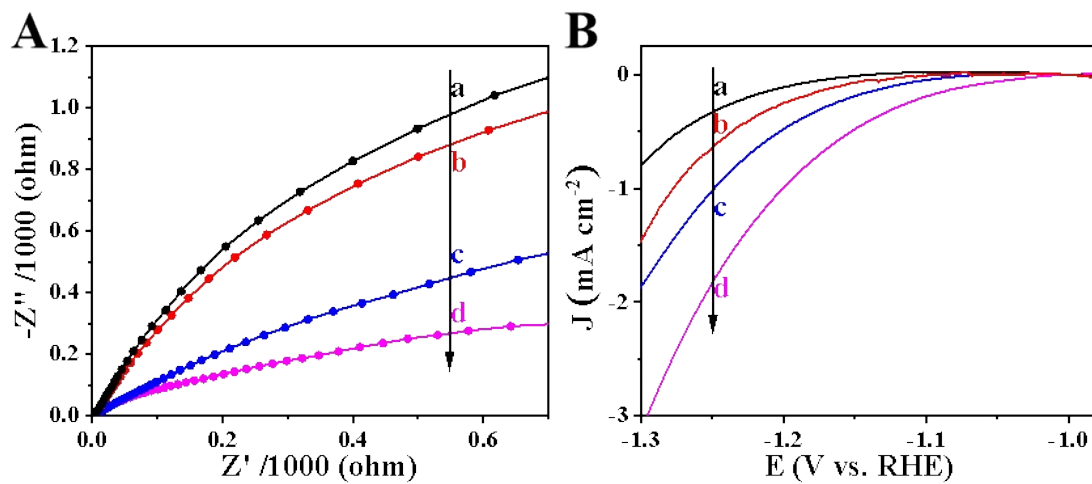

**Fig. S8.** (A) Electrochemical impedance spectra (EIS) and (B) linear sweep voltammetry (LSV) curves of (a) CdS, (b)  $\text{Ti}_3\text{C}_2\text{F}_x/\text{CdS}$ , (c)  $\text{NiOOH-Ti}_3\text{C}_2\text{F}_x(1:1)/\text{CdS}$ , and (d)  $\text{NiOOH-Ti}_3\text{C}_2\text{F}_x(1:5)/\text{CdS}$ .
